# Supplementary material for: Benidipine calcium channel blocker promotes the death of cigarette smoke-induced senescent cells and improves lung emphysema
Source: publisher site journal article supplement (doi:10.18632/aging.205259), 2023-12-12
Supplement: Supplementary file [file aging-v15i23-205259-supplementary-material-SD2.pdf]

## SUPPLEMENTARY TABLES

**Supplementary Table 1. List of 134 molecules selected after the first round of screening.**

|                                  |                                                               |                                 |                                 |                                      |
|----------------------------------|---------------------------------------------------------------|---------------------------------|---------------------------------|--------------------------------------|
| 2-Methoxyestradiol (2-MeOE2)     | Cinacalcet                                                    | Erlotinib Hydrochloride         | MLN2238                         | Raltitrexed                          |
| ABT-263 (Navitoclax)             | Cinacalcet HCl                                                | Ethacridine lactate monohydrate | MLN8237 (Alisertib)             | Regorafenib                          |
| Afatinib (BIBW2992)              | Cobicistat (GS-9350)                                          | Felodipine                      | Mocetinostat (MGCD0103, MG0103) | Regorafenib hydrochloride            |
| Afatinib dimaleate               | CUDC-101                                                      | Fenbendazole                    | Motolimod (VTX-2337)            | RG7388                               |
| Amlodipine                       | Curcumin                                                      | Fingolimod (FTY720)             | Mycophenolate Mofetil           | Rocilinosat (ACY-1215)               |
| Amlodipine Besylate              | Cyclosporin A                                                 | Flunarizine 2HCl                | Nifedipine                      | Romidepsin (FK228, depsipeptide)     |
| Anidulafungin                    | Cyclosporine                                                  | Fluvastatin                     | Nintedanib (BIBF 1120)          | Rupatadine Fumarate                  |
| Aprotinin                        | Dabigatran etexilate mesylate                                 | Fluvastatin Sodium              | Nisoldipine                     | Salmeterol xinafoate                 |
| Azelnidipine                     | Dasatinib (BMS-354825)                                        | Foretinib (GSK1363089)          | Novobiocin Sodium               | Saracatinib (AZD0530)                |
| Azithromycin                     | Daunorubicin HCl                                              | Ganetespib (STA-9090)           | Olaparib (AZD2281, Ku-0059436)  | Sertaconazole nitrate                |
| Azithromycin Dihydrate           | Dehydroepiandrosterone (DHEA)                                 | Hydroxychloroquine Sulfate      | Oltipraz                        | Suprofen                             |
| Bardoxolone methyl               | Desloratadine                                                 | Ibuprofen Lysine                | Orlistat                        | Telaprevir (VX-950)                  |
| Belinostat (PXD101)              | Digoxin                                                       | Idarubicin HCl                  | Oxytocin                        | Tetracaine HCl                       |
| Benidipine HCl                   | Disulfiram                                                    | Idebenone                       | Pacritinib                      | TG101348 (SAR302503)                 |
| Benzydamine HCl                  | DL- $\alpha$ -Difluoromethylornithine (hydrochloride hydrate) | Imatinib (STI571)               | Pamidronate Disodium            | Tofacitinib (CP-690550, Tasocitinib) |
| Birinapant (TL32711)             | Docetaxel Trihydrate                                          | Imatinib Mesylate (STI571)      | Panobinostat (LBH589)           | Trandolapril                         |
| Cabozantinib (XL184, BMS-907351) | Domiphen Bromide                                              | Ispinesib (SB-715992)           | Pazopanib (GW-786034)           | Trifluoperazine 2HCl                 |
| Cabozantinib malate (XL184)      | Doxorubicin                                                   | Isradipine (Dynacirc)           | PCI-24781 (CRA-024781)          | Vandetanib (ZD6474)                  |
| Calcitriol                       | Drospirenone                                                  | Ivermectin                      | PCI-32765 (Ibrutinib)           | Vemurafenib (PLX4032, RG7204)        |
| Carfilzomib (PR-171)             | Dyclonine HCl                                                 | K-115                           | Pelitinib (EKB-569)             | Verapamil HCl                        |
| Carmofur                         | Ebastine                                                      | Lacidipine                      | Pimasertib (AS-703026)          | Vinorelbine                          |
| CEP-18770                        | EMD-1214063                                                   | Lomitapide                      | Ponatinib (AP24534)             | Vorinostat (SAHA, MK0683)            |
| Cepharanthine                    | Entinostat (MS-275, SNDX-275)                                 | Lovastatin                      | Pracinostat (SB939)             | VX-680 (MK-0457, Tozasertib)         |
| Cetrimonium Bromide (CTAB)       | Entrectinib                                                   | LY2784544                       | Proflavine Hemisulfate          | YM155                                |
| Cetylpyridinium Chloride         | Enzastaurin (LY317615)                                        | Mefloquine hydrochloride        | Quetiapine Fumarate             | Zinc Pyrithione                      |
| Chlorquinaldol                   | Epirubicin HCl                                                | Mevastatin                      | R788 disodium                   | Zoledronic Acid                      |
| Cilnidipine                      | Erlotinib                                                     | Mitoxantrone HCl                | Raloxifene HCl                  |                                      |

CS-induced lung senescent cells were treated with 10  $\mu$ M of each 1,379 molecule contained in the FDA-approved library and the number of nuclei were automatically counted. We selected molecules that resulted in an approximate 40% decrease in stained nuclei and we excluded molecules known to have broad cytotoxic activity independently of senescence.

**Supplementary Table 2. List of primers used.**

| <b>Gene</b> | <b>Primer forward</b>  | <b>Primer reverse</b>     | <b>UPL#</b> |
|-------------|------------------------|---------------------------|-------------|
| GAPDH       | AGCCACATCGCTCAGACAC    | GCCCAATACGACCAAATCC       | 60          |
| CDKN1A/p21  | TCACTGTCTTGTACCCTTGTGC | GGCGTTTGGAGTGGTAGAAAT     | 32          |
| SPP1        | GAGGGCTTGGTTGTCAGC     | CAATTCTCATGGTAGTGAGTTTTCC | 18          |
| ANGPTL4     | GACAAGAAGCTGCGCCAAGA   | GCCGTTGAGGTTGGAATG        | 49          |
| mCDKN1A/p21 | TGCGCTTGGAGTGATAGAAA   | AACATCTCAGGGCCGAAA        | NA          |
| mGAPDH      | CCTGCTTCACCACCTTCTTG   | TGTCCGTCGTGGATCTGAC       | NA          |
